# Supplementary material
Source: publisher figshare collection journal article supplement (https://plos.figshare.com/articles/dataset/_/1006595)
Supplement: Supplementary file [file 1]

| Organism | Transcriptomics                                      | Fluxomics                     | Other data                 | Conditions                                                                                                             | Reference                                                         |
|----------|------------------------------------------------------|-------------------------------|----------------------------|------------------------------------------------------------------------------------------------------------------------|-------------------------------------------------------------------|
| E. coli  | genome wide                                          | exchange (8)                  |                            | Batch growth of wild-type and 6 gene deletion mutants under aerobic and anaerobic conditions                           | Covert et al, 2004                                                |
| E. coli  | central carbon (73)<br>(relative expression)         | internal (25)                 |                            | Batch growth (aerobic) of wild-type and 3 gene deletion mutants                                                        | Fong et al, 2006                                                  |
| E. coli  | central carbon (85)                                  | internal (42)<br>exchange (9) | proteomics<br>metabolomics | Chemostat growth (aerobic) of wild-type at 5 dilution rates and 24 single gene deletion mutants (0.2 h <sup>-1</sup> ) | Ishii et al, 2007                                                 |
| E. coli  | genome wide                                          | internal (25)<br>exchange (2) | metabolomics               | Batch growth (aerobic) of wild-type and 2 over expression mutants                                                      | Holm et al, 2009                                                  |
| E. coli  | genome wide (relative expression)                    | internal (32)<br>exchange (8) | metabolomics               | Chemostat growth (0.2 h <sup>-1</sup> ) of wild-type and arcA mutant (aerobic, anaerobic and nitrate limited)          | Toya et al, 2012                                                  |
| Yeast    | genome wide                                          | exchange (3)                  |                            | Chemostat growth (0.1 h <sup>-1</sup> ) using 4 different carbon sources                                               | Lapujade et al, 2004                                              |
| Yeast    | genome wide (relative expression)                    | internal (83)                 | metabolomics               | Chemostat growth (aerobic, 0.1 h <sup>-1</sup> ) of wild-type and gcn4 mutant                                          | Moxley et al, 2009                                                |
| Yeast    | central carbon (41)                                  | exchange (8)                  | metabolomics               | Chemostat growth (anaerobic, 0.03 h <sup>-1</sup> ) of 2 yeast strains under glucose and arabinose limited conditions  | Wisselink et al, 2010                                             |
| Yeast    | differentially expressed genes (relative expression) | internal (55)                 | metabolomics               | Batch growth (anaerobic) of yeast at different levels of NADPH oxidation                                               | Celton et al, 2012                                                |
| Yeast    | genome wide                                          | exchange (7)                  |                            | Chemostat growth (aerobic) at 75% and 85% of maximum growth rate                                                       | Lee et al, 2012                                                   |
| Yeast    | genome wide                                          | internal (28)<br>exchange (4) | proteomics<br>metabolomics | Chemostat growth (0.1 h <sup>-1</sup> ) of yeast at different oxygen levels                                            | Wiebe et al, 2007;<br>Jouhten et al, 2008;<br>Rintala et al, 2009 |

Covert MW, Knight EM, Reed JL, Herrgard MJ, Palsson BO (2004) Integrating high-throughput and computational data elucidates bacterial networks. *Nature* 429: 92–96.

---

Fong SS, Nanchen A, Palsson BO, Sauer U (2006) Latent pathway activation and increased pathway capacity enable *Escherichia coli* adaptation to loss of key metabolic enzymes. *Journal of Biological Chemistry* 281: 8024–8033.

---

Ishii N, Nakahigashi K, Baba T, Robert M, Soga T, et al. (2007) Multiple high-throughput analyses monitor the response of *E. coli* to perturbations. *Science Signalling* 316: 593.

---

Holm AK, Blank LM, Oldiges M, Schmid A, Solem C, et al. (2010) Metabolic and transcriptional response to cofactor perturbations in *Escherichia coli*. *Journal of Biological Chemistry* 285: 17498–17506.

---

Toya Y, Nakahigashi K, Tomita M, Shimizu K (2012) Metabolic regulation analysis of wild-type and *arcA* mutant *Escherichia coli* under nitrate conditions using different levels of omics data. *Molecular BioSystems* 8: 2593–2604.

---

Daran-Lapujade P, Jansen ML, Daran JM, van Gulik W, de Winde JH, et al. (2004) Role of Transcriptional Regulation in Controlling Fluxes in Central Carbon Metabolism of *Saccharomyces cerevisiae*, a Chemostat Culture Study. *Journal of Biological Chemistry* 279: 9125–9138.

---

Moxley J, Jewett M, Antoniewicz M, Villas-Boas S, Alper H, et al. (2009) Linking high-resolution metabolic flux phenotypes and transcriptional regulation in yeast modulated by the global regulator Gcn4p. *Proceedings of the National Academy of Sciences* 106: 6477–6482.

---

Wisselink HW, Cipollina C, Oud B, Crimi B, Heijnen JJ, et al. (2010) Metabolome, transcriptome and metabolic flux analysis of arabinose fermentation by engineered *Saccharomyces cerevisiae*. *Metabolic Engineering* 12: 537–551.

---

Celton M, Sanchez I, Goelzer A, Fromion V, Camarasa C, et al. (2012) A comparative transcriptomic, fluxomic and metabolomic analysis of the response of *Saccharomyces cerevisiae* to increases in NADPH oxidation. *BMC Genomics* 13: 317.

---

Lee D, Smallbone K, Dunn W, Murabito E, Winder C, et al. (2012) Improving metabolic flux predictions using absolute gene expression data. *BMC Systems Biology* 6: 73.

---

Wiebe MG, Rintala E, Tamminen A, Simolin H, Salusjarvi L, et al. (2008) Central carbon metabolism of *Saccharomyces cerevisiae* in anaerobic, oxygen-limited and fully aerobic steady-state conditions and following a shift to anaerobic conditions. *FEMS Yeast Research* 8: 140–154.

---

Jouhten P, Rintala E, Huuskonen A, Tamminen A, Toivari M, et al. (2008) Oxygen dependence of metabolic fluxes and energy generation of *Saccharomyces cerevisiae* CEN. PK113-1A. *BMC Systems Biology* 2: 60.

---

Rintala E, Toivari M, Pitkanen JP, Wiebe MG, Ruohonen L, et al. (2009) Low oxygen levels as a trigger for enhancement of respiratory metabolism in *Saccharomyces cerevisiae*. *BMC Genomics* 10: 461.
