# Supplementary material
Source: publisher figshare collection journal article supplement (https://plos.figshare.com/articles/dataset/_/1006595)
Supplement: Supplementary file [file 1]

| Method     | Organisms                        | Input data                                                                               | Validation                                                                                                                                        | Methods compared |
|------------|----------------------------------|------------------------------------------------------------------------------------------|---------------------------------------------------------------------------------------------------------------------------------------------------|------------------|
| Akesson-04 | S.cerevisiae                     | Piper et al, 2002                                                                        | Secretion rates (same study) and 13C fluxes (Gombert et al, 2001)                                                                                 |                  |
| GIMME      | E.coli, Human                    | Fong and Palsson 2004; Park et al, 2006; Parikh et al 2007                               | Consistency between original and readjusted expression levels                                                                                     |                  |
| iMAT       | S.cerevisiae, Human              | Lapujade et al, 2004; Shmueli et al, 2003; Mishra et al, 2006                            | Consistency of human tissue-specific gene activity with known evidence (multiple databases); S.cerevisiae MFA data (Lapujade et al, 2004)         |                  |
| Moxley-09  | S.cerevisiae                     | Same study                                                                               | 13C fluxes (same study)                                                                                                                           |                  |
| E-Flux     | M.tuberculosis                   | Boshoff et al, 2004                                                                      | Qualitative agreement with known inhibitory drugs (Boshoff et al, 2004)                                                                           |                  |
| PROM       | E.coli, M.tuberculosis           | Covert et al 2004; Boshoff et al, 2004                                                   | Growth rate of multiple mutants for E.coli (Covert et al, 2004) and M.tuberculosis (Sasseti et al, 2003; Gao et al, 2005; Lamichhane et al, 2003) | rFBA             |
| MADE       | S.cerevisiae                     | Roberts and Hudson, 2006                                                                 | Consistency between original and adjusted gene expression patterns                                                                                |                  |
| tFBA       | S.cerevisiae                     | Knijnenburg et al, 2009                                                                  | Qualitative agreement between gene expression and flux changes (Boer et al, 2003; Tai et al, 2005)                                                | FBA, rFBA        |
| INIT       | Human                            | Human Proteome Atlas database                                                            | Comparison of generated hepatocyte model with manually curated model, qualitative agreement of predicted drug targets in cancer cell lines        |                  |
| Lee-12     | S.cerevisiae                     | Same study                                                                               | Secretion rates (same study)                                                                                                                      | FBA, GIMME, iMAT |
| Fang-12    | S.cerevisiae, M.tuberculosis     | Park et al, 2003                                                                         | MFA data for S. cerevisiae (Lapujade et al, 2004). Qualitative agreement with known metabolic adaptation responses of M. tuberculosis             |                  |
| RELATCH    | E.coli, S.cerevisiae, B.subtilis | Covert et al 2004; Canelas et al, 2010; Tannler et al, 2008                              | 13C fluxes for E.coli (Fong et al, 2006; Ishii et al, 2004), S. cerevisiae (Blank et al, 2005) and B.subtilis (Fischer and Sauer, 2005)           | FBA, MOMA, ROOM  |
| TEAM       | S.oneidensis                     | Beg et al, 2012                                                                          | Qualitative agreement with temporal exometabome profiles (Beg et al, 2012)                                                                        | dFBA             |
| AdaM       | E.coli                           | Jozefczuk et al, 2010                                                                    | No validation with independent experimental data                                                                                                  | MADE             |
| GX-FBA     | S.cerevisiae, Y.pestis           | Lapujade et al, 2004; Han et al, 2004; Motin et al, 2004; Qiu et al 2005; Qiu et al 2006 | MFA data for S.cerevisiae (Lapujade et al, 2004), qualitative agreement with known metabolic responses of Y.pestis                                |                  |
| mCADRE     | Human                            | McCall et al, 2011                                                                       | Qualitative agreement of generated models for liver and other tissues with literature based evidence                                              | MBA              |
| FCGs       | E.coli                           | Ishii et al, 2007                                                                        | 13C fluxes (Ishii et al, 2007)                                                                                                                    | FBA, MOMA        |
| EXAMO      | S.cerevisiae                     | Gasch et al, 2000                                                                        | Gene essentiality data (Giaever et al, 2002; Snitkin et al 2008); Predicted fluxes in qualitative agreement with known yeast physiology           | MBA, iMAT        |
